# Supplementary material for: Automated MRI-based brain volumetry demonstrates excellent intraindividual robustness in short-term follow-up despite pronounced regional variability
Source: Research Square preprint supplement (doi:10.21203/rs.3.rs-8758966/v1), 2026-02-09
Supplement: Supplementary file 1 [file 7c51aff45444d45e5509dc39.docx]

**Supplemental digital content**

**Text S1: Device-specific effects on longitudinal volumetric measurements in same-scanner examinations**

We further subdivided the first subgroup of patients (n=22; see **Subsection 3.4**, **Figure 3**), comprising those scanned on the same MRI machine during both visits to our facility, into three groups. The first subgroup consisted of patients scanned twice on MAGNETOM Prisma (n=3), the second subgroup of patients scanned twice on Biograph mMR PET-MR (n=12), and the third subgroup of patients scanned twice on MAGNETOM Trio (n=7). Across all regions, the spread of volumetric delta values differed substantially between scanners, it was lowest in the Prisma group (median=-0.54%, LQ-UQ: -2.5% – +1.5%, range: -9.1% – +14.2%). The Trio group showed the highest spread (median=+0.4%, LQ-UQ: -1.1% – +3.7%, range: -20.5% – +55.6%). While the overall range was smaller in the Biograph group (median=+0.09%, LQ-UQ: -2.2% – +5.7%, range: -30.0% – +35.1%) than in the Trio group, the interquartile range was highest in the Biograph group (IQR=7.9) , compared with the Trio (IQR=4.8) and Prisma (IQR=4). An exploratory Kruskal-Wallis test was conducted on pooled percentage deltas across all regions. Despite the limited sample size per subgroup, it revealed a significant difference between the three groups (p=5×10⁻⁹).

| **Supplementary Table S1.** Device settings for 3D T1 MPRAGE on different MRI-scanners in our facility. | | | | | |
| --- | --- | --- | --- | --- | --- |
| **MRI scanner*** | **Inversion time (ms)** | **Flip angle (°)** | **Repetition time (ms)** | **Pixel bandwidth** | **Number of imaging per scanner** |
| 3T Biograph mMR PET-MR system | 1040 | 9 | 1830 | 180 | 45 |
| 3T MAGNETOM Prisma | 900 | 8 | 1800 | 160 | 17 |
| 3T MAGNETOM Trio | 900 | 9 | 1900 | 199 | 15 |
| *Devices are from Siemens Healthineers/Healthcare GmbH, Erlangen Germany. Abbreviations: T, Tesla, magnetic field strength. | | | | | |

| **Supplementary Table S2.** Number of scans from external facilities on different MRI-scanners in | | |
| --- | --- | --- |
| **MRI scanner*** | **Field strength, T** | **Number of imaging per scanner** | |
| MAGNETOM Prisma | 3 | 1 (6.7%) | |
| MAGNETOM Skyra | 3 | 1 (6.7%) | |
| MAGNETOM Spectra | 3 | 1 (6.7%) | |
| MAGNETOM Verio | 3 | 1 (6.7%) | |
| MAGNETOM Aera | 1.5 | 5 (33.3%) | |
| MAGNETOM Avanto | 1.5 | 3 (20.0%) | |
| MAGNETOM Sola | 1.5 | 1 (6.7%) | |
| MAGNETOM Sonata | 1.5 | 1 (6.7%) | |
| MAGNETOM Symphony | 1.5 | 1 (6.7%) | |
| Total |  | 15 | |
| *Devices are from Siemens Healthineers/Healthcare GmbH, Erlangen Germany. Abbreviations: T, Tesla, magnetic field strength. | | |

| **Supplementary Table S3:** Summary table of other anatomical AIRC-regions. | | | | | | |
| --- | --- | --- | --- | --- | --- | --- |
| **AIRC-Region** | **Intraclass correlation coefficient (ICC)** | **two sample t-test, p-value** | **Maloney-Rastogi-test, p-value** | **mean delta [%]** | **Maximum delta [%]** | **Minimum delta [%]** |
| thalamus | 0.98 | 0.8367 | 0.3814 | 0.19 | 8.04 | -7.69 |
| thalamus left | 0.96 | 1.0000 | 0.3591 | 0.17 | 11.54 | -8.33 |
| thalamus right | 0.98 | 0.1663 | 0.9733 | 0.62 | 5.56 | -8.11 |
| putamen | 0.89 | 0.5566 | 0.5262 | 0.93 | 49.44 | -6.67 |
| putamen left | 0.88 | 0.3712 | 0.5959 | 1.42 | 55.56 | -7.41 |
| putamen right | 0.88 | 0.9050 | 0.5289 | 0.45 | 43.18 | -7.27 |
| caudate | 0.90 | 0.0440 | 0.4245 | 1.95 | 20.55 | -15.22 |
| caudate left | 0.89 | 0.0994 | 0.6310 | 1.70 | 29.41 | -15.91 |
| caudate right | 0.87 | 0.0642 | 0.2597 | 2.06 | 19.05 | -12.77 |
| pallidum | 0.94 | 0.3476 | 0.4724 | 1.14 | 29.63 | -7.69 |
| pallidum left | 0.93 | 0.6112 | 0.9283 | 0.74 | 28.57 | -10.00 |
| pallidum right | 0.91 | 0.4596 | 0.7248 | 1.08 | 30.77 | -13.64 |
| 4th ventricle | 0.94 | 0.1670 | 0.7353 | 4.11 | 68.75 | -30.00 |
| cerebellum (WM + GM) | 0.91 | 0.6351 | 0.7642 | -0.18 | 19.60 | -22.13 |
| pons | 0.98 | 0.6312 | 0.1812 | 0.33 | 7.33 | -7.74 |
| mesencephalon | 0.94 | 0.2394 | 0.3641 | 1.17 | 15.85 | -7.23 |
| corpus callosum | 0.95 | 0.7413 | 0.5948 | 0.68 | 27.03 | -10.00 |
| cingulate GM left | 0.90 | 0.1109 | 0.4173 | -1.99 | 27.50 | -26.92 |
| cingulate GM right | 0.93 | 0.2906 | 0.2214 | -1.21 | 28.85 | -34.29 |
| medulla oblongata | 0.95 | 1.0000 | 0.7900 | 0.18 | 13.16 | -12.77 |
| occipital GM left | 0.87 | 0.9563 | 0.2459 | 0.54 | 36.70 | -38.38 |
| occipital GM right | 0.89 | 0.3745 | 0.2471 | -1.08 | 27.52 | -35.95 |
| insula left | 0.91 | 0.5277 | 0.5234 | 1.59 | 46.15 | -22.86 |
| insula right | 0.90 | 0.5523 | 0.7229 | 1.22 | 50.00 | 0.00 |
| occipital WM left | 0.88 | 0.0639 | 0.3241 | 4.41 | 47.83 | -17.31 |
| occipital WM right | 0.85 | 0.0143 | 0.5831 | 4.52 | 27.63 | -19.47 |
| AI-based brain volumetric analyses; *volumetric differences (deltas, %) were generated using AI-Rad Companion Brain MR (version VA40 [AIRC], Siemens Healthineers, Forchheim, Germany); Abbreviations: GM: gray matter, WM: white matter | | | | | | |
